# Supplementary material for: Improving the relevance of paleontology to climate change policy
Source: PubMed Central journal article supplement — Proc Natl Acad Sci U S A. 2023 Feb 6;120(7):e2201926119. doi: 10.1073/pnas.2201926119 (PMC9963848; doi:10.1073/pnas.2201926119), 2023-02-06
Supplement: pnas.2201926119.sapp.pdf [file pnas.2201926119.sapp.pdf]

## **Supplementary Information for** Improving the relevance of paleontology to climate change policy

Paste the full author list here

Wolfgang Kiessling<sup>1</sup>, Jansen A. Smith<sup>1,2</sup> and Nussaibah B. Raja<sup>1</sup>

\*Wolfgang Kiessling.

**Email:** [wolfgang.kiessling@fau.de](mailto:wolfgang.kiessling@fau.de)

<sup>1</sup>GeoZentrum Nordbayern, Friedrich-Alexander Universität (FAU) Erlangen-Nürnberg, Loewenichstraße 28, D-91054 Erlangen, Germany

<sup>2</sup>Paleontological Research Institution, 1259 Trumansburg Road, Ithaca, NY, 14850, USA

### **This PDF file includes:**

Table S1

### **Other supplementary materials for this manuscript include the following:**

Datasets S1 to S2

**Table S1.** Scoring guidelines based on the assessed needs of the IPCC for scientific publications

| <b>Category</b>                                    | <b>Scoring</b>                                                                                                                                                                                                                                                                 | <b>Maximum</b> |
|----------------------------------------------------|--------------------------------------------------------------------------------------------------------------------------------------------------------------------------------------------------------------------------------------------------------------------------------|----------------|
| Framing                                            | 0: No mention between biodiversity and climate<br>+1: Link between life and climate explicitly mentioned in title<br>+1: Link between life and climate explicitly mentioned in abstract                                                                                        | 2              |
| Taxonomic Scope                                    | 0: One species only<br>+1: More than one species<br>+1: Multiple higher taxa (class level)                                                                                                                                                                                     | 2              |
| Reporting                                          | 0: No report of significance, effect size or uncertainties<br>+1: Reporting of significance<br>+1: Reporting of effect size<br>+1: Reporting of uncertainties in the form of e.g. confidence intervals, standard errors, posterior distribution                                | 3              |
| Attribution to climate change                      | 0: No mention of climate change or no explanation and/or testing of how climate may have contributed to change<br>+1: Component of climate-related stressors indicated<br>+1: Quantitative testing (e.g. cross-correlation tests, selectivity of extinction, spatial patterns) | 2              |
| Relevance for prediction of future climate impacts | 0: None<br>+1: Potentially relevant<br>+2: Directly relevant, providing long-term scenario                                                                                                                                                                                     | 2              |
|                                                    | <b>Total</b>                                                                                                                                                                                                                                                                   | <b>11</b>      |

All scores are additive, except for the prediction relevance, which is an either/or category.
